# Supplementary material for: Complex multi-fault rupture and triggering during the 2023 earthquake doublet in southeastern Türkiye
Source: PubMed Central journal article supplement (PMC10492857; doi:10.1038/s41467-023-41404-5), 2023-09-09
Supplement: 41467_2023_41404_MOESM1_ESM.pdf [file 41467_2023_41404_MOESM1_ESM.pdf]

Supplementary Materials for

## **Complex multi-fault rupture and triggering during the 2023 earthquake doublet in southeastern Türkiye**

Chengli Liu<sup>1\*</sup>, Thorne Lay<sup>2</sup>, Rongjiang Wang<sup>1,3</sup>, Tuncay Taymaz<sup>4</sup>, Zujun Xie<sup>1</sup>, Xiong Xiong<sup>1</sup>, Tahir Serkan Irmak<sup>5</sup>, Metin Kahraman<sup>6</sup> & Ceyhun Erman<sup>4</sup>

<sup>1</sup>School of Geophysics and Geomatics, China University of Geosciences, Wuhan, Hubei, China.

<sup>2</sup>Department of Earth and Planetary Sciences, University of California Santa Cruz; Santa Cruz, CA, USA.

<sup>3</sup>GFZ German Research Centre for Geosciences, Potsdam, Germany.

<sup>4</sup>Department of Geophysical Engineering, The Faculty of Mines, İstanbul Technical University, Maslak 34467, Sarıyer, İstanbul, Türkiye.

<sup>5</sup>Department of Geophysical Engineering, Kocaeli University, Umuttepe 41380, Kocaeli, Türkiye.

<sup>6</sup>Eurasian Institute of Earth Sciences, İstanbul Technical University, Maslak 34467, Sarıyer, İstanbul, Türkiye.

\*Corresponding author: C.L.: liuchengli@cug.edu.cn

### **This PDF file includes:**

Supplementary Figs. 1 to 13.

Supplementary Tables 1 to 3.

**Mw7.8**

P-Wave

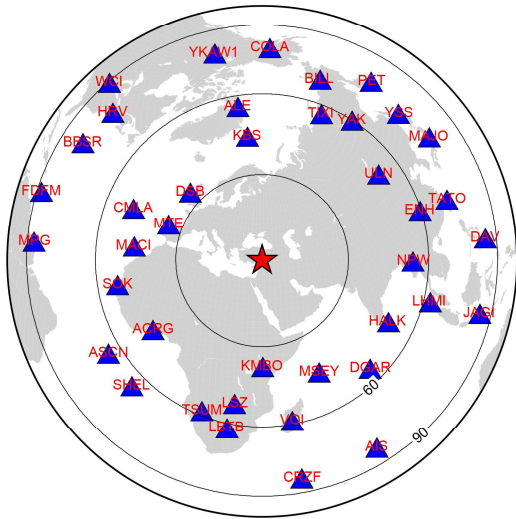

SH-Wave

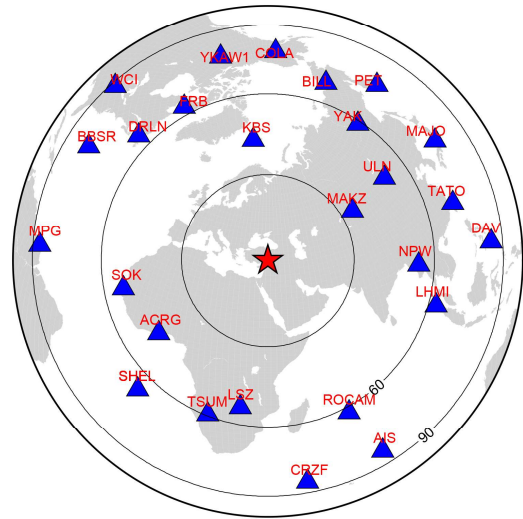

**Mw7.7**

P-Wave

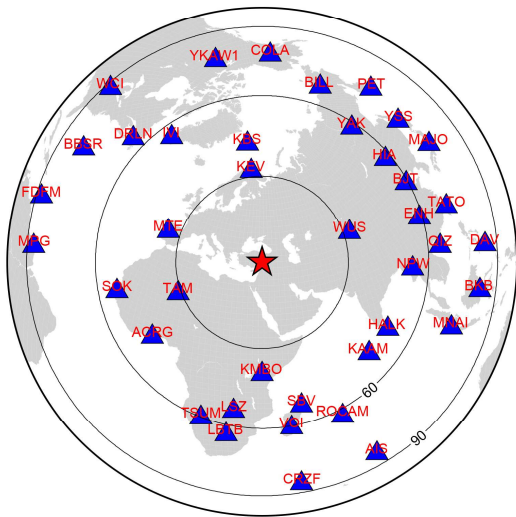

SH-Wave

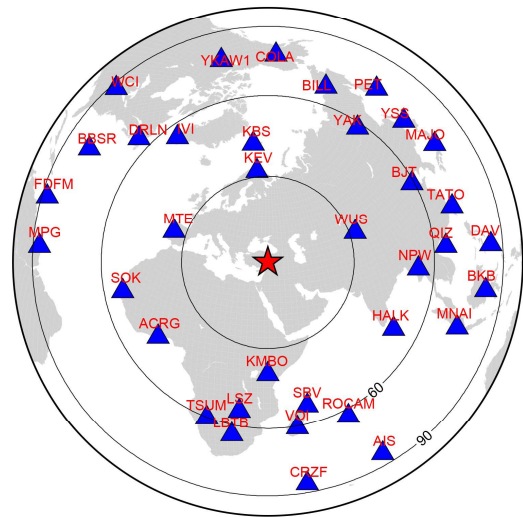

**Supplementary Fig. 1.** The teleseismic broadband seismic station distributions of the 2023 Türkiye earthquake doublet utilized in the separate finite-fault inversions for the two events.

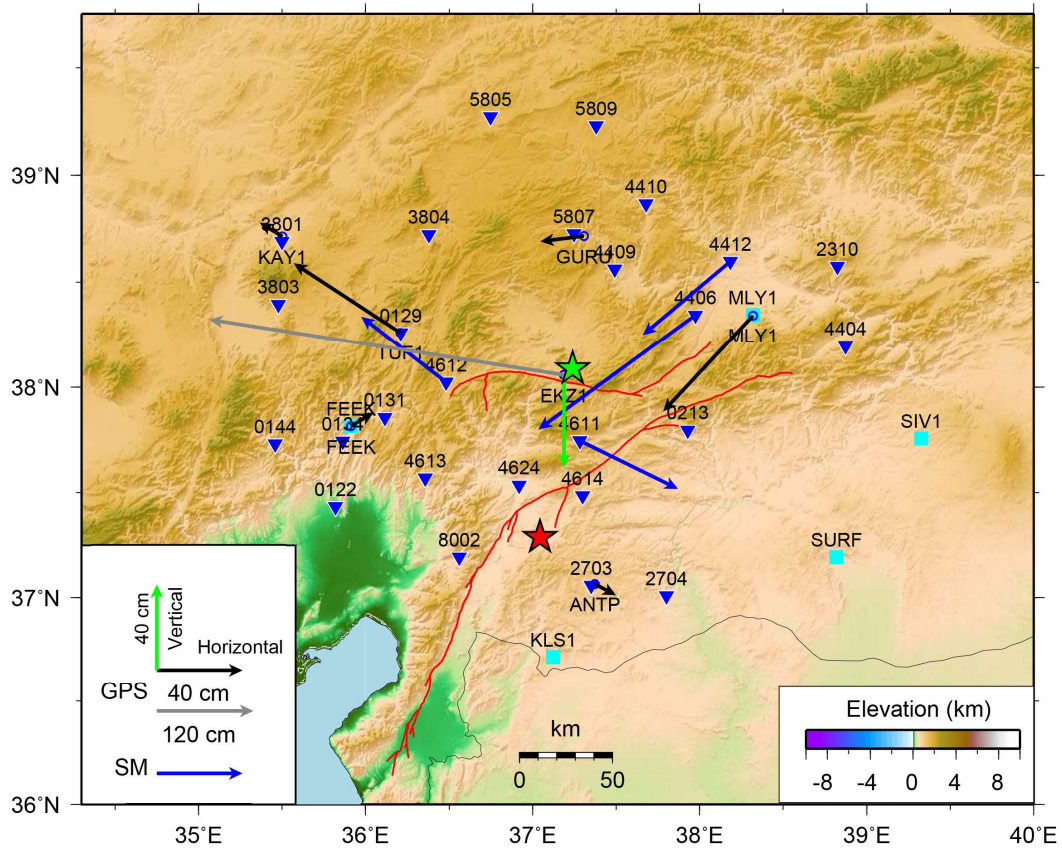

**Supplementary Fig. 2.** Distribution of strong-motion stations (inverted blue triangles) and GNSS stations (cyan squares and blue circles) for the  $M_w$  7.7 event. Black and gray vectors indicate the horizontal GNSS static displacements, and the green vector indicates a vertical GNSS static displacement. Blue vectors show the horizontal coseismic displacements derived from strong-motion data. These data are used in the joint inversion. The epicenters of the  $M_w$  7.8 and  $M_w$  7.7 events are shown by the red and green stars, respectively, and the red lines represent positions of fault ruptures detected by post-earthquake satellite data.

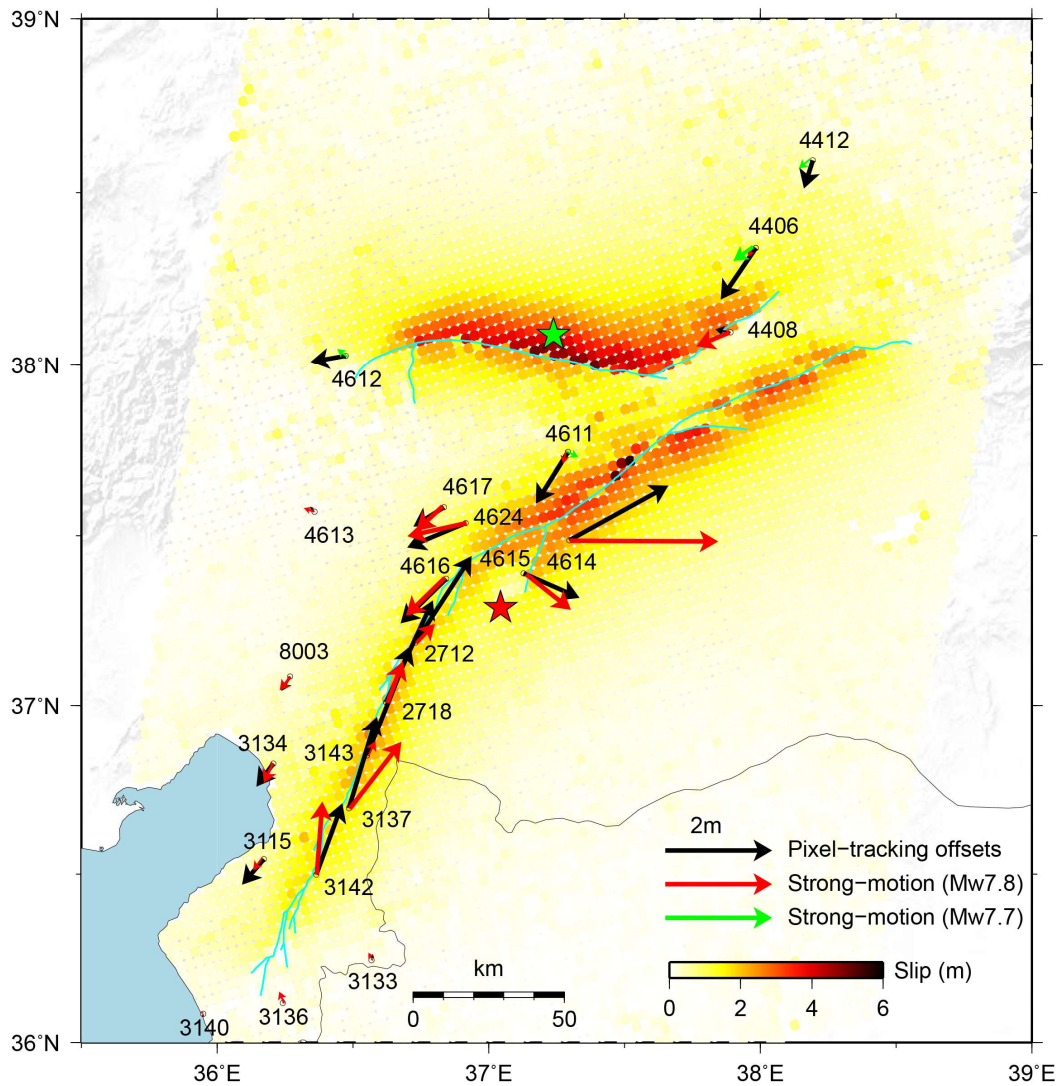

**Supplementary Fig. 3.** Comparisons between the coseismic displacements derived from the strong-motions of the earthquake doublet and the composite horizontal displacements derived from pixel-tracking offsets of Sentinel-1 satellite radar images. Cyan lines depict the positions of fault ruptures detected by post-earthquake satellite data. Black arrows represent the averaged horizontal displacements within a 1 km range, while the displacements derived from the strong-motion of the  $M_w$  7.8 and  $M_w$  7.7 events are indicated by red and green arrows, respectively. The red and green stars show epicenters of the  $M_w$  7.8 and  $M_w$  7.7 events, respectively.

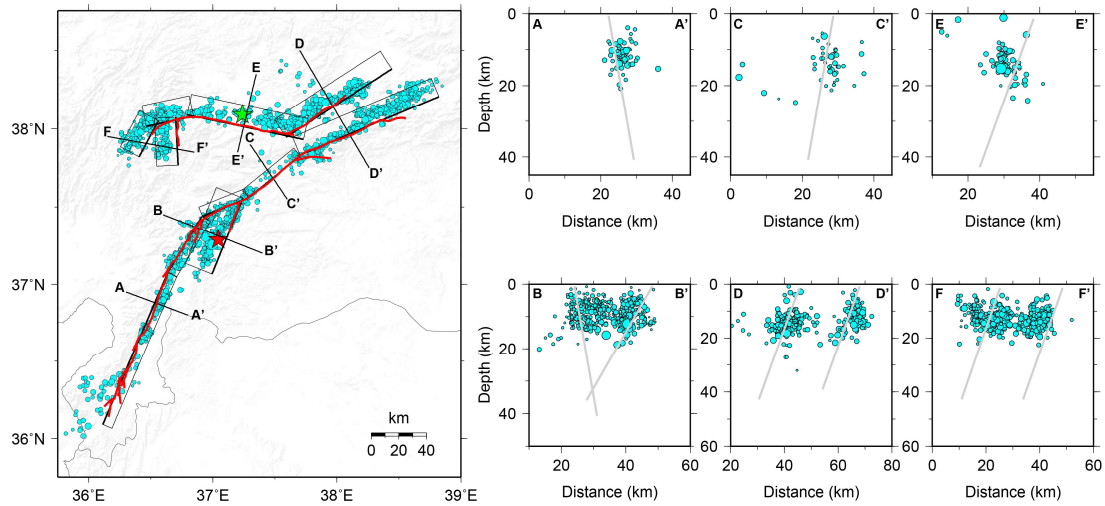

**Supplementary Fig. 4.** Map and cross-section display the distribution of relocated aftershocks along various profiles. Red and green stars represent the epicenters of the  $M_w$  7.8 and  $M_w$  7.7 events, respectively. Cyan-filled circles, sized proportionally to magnitude, indicate the relocated aftershocks with a magnitude greater than 1.0. The fault ruptures, identified through post-earthquake satellite data, are represented by red lines. Assumed fault segments are indicated by black rectangles, with the shallow (surface) edge depicted with thicker lines. In each cross-section, the gray lines denote the position and dip of the intersected fault segments.

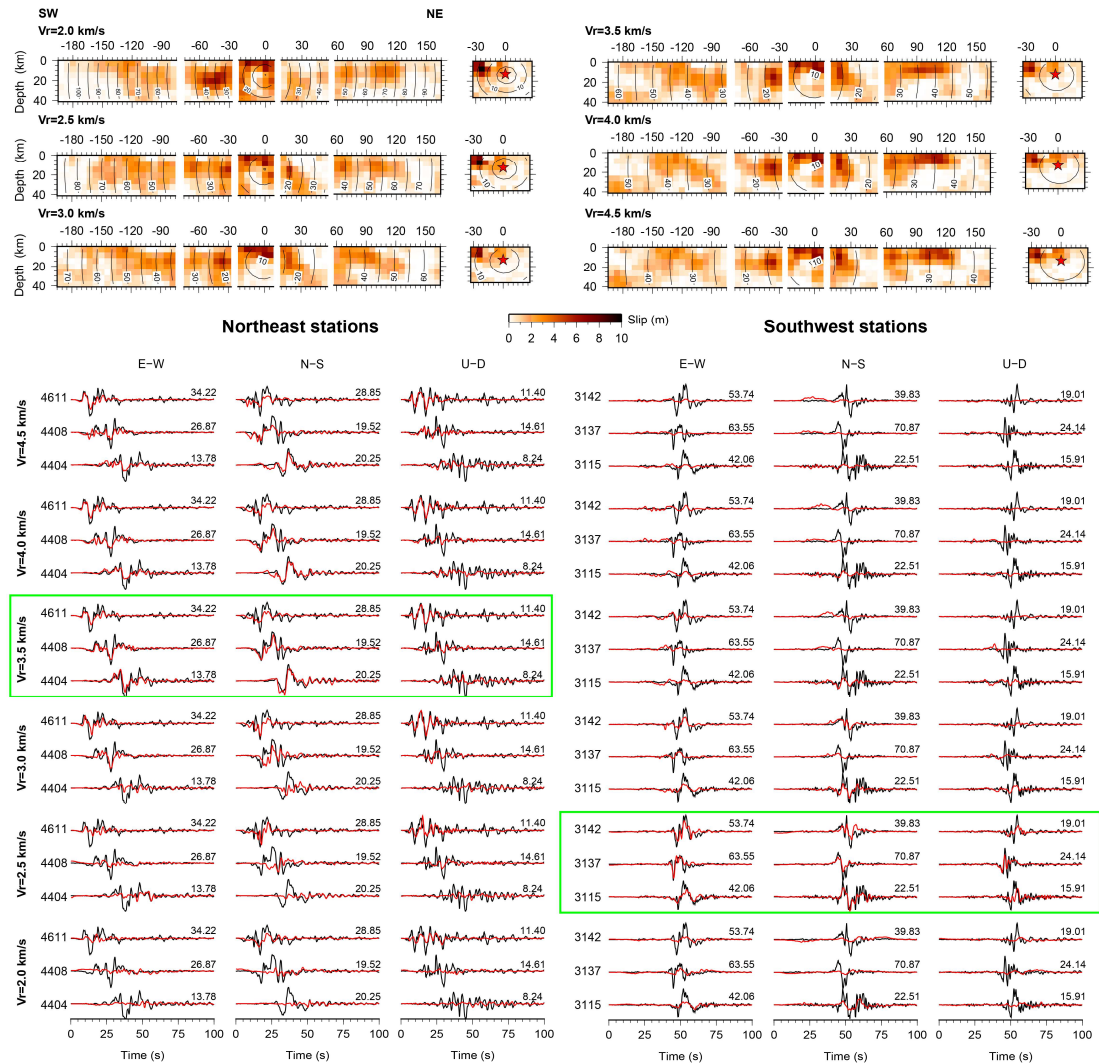

**Supplementary Fig. 5.** Tests of imposed uniform rupture velocity constraints. The upper panel displays the slip models obtained using specified rupture velocities ranging from 2.0 to 4.5 km/s over the entire model. The lower panels show the waveform fitting for the models with different rupture velocities. Representative stations to the northeast and southwest are displayed (see Fig. 2). The station names are shown to the left of each three-component record. Green rectangles outline waveform fits for optimal average rupture velocities, which vary in the northeast and southwest directions.



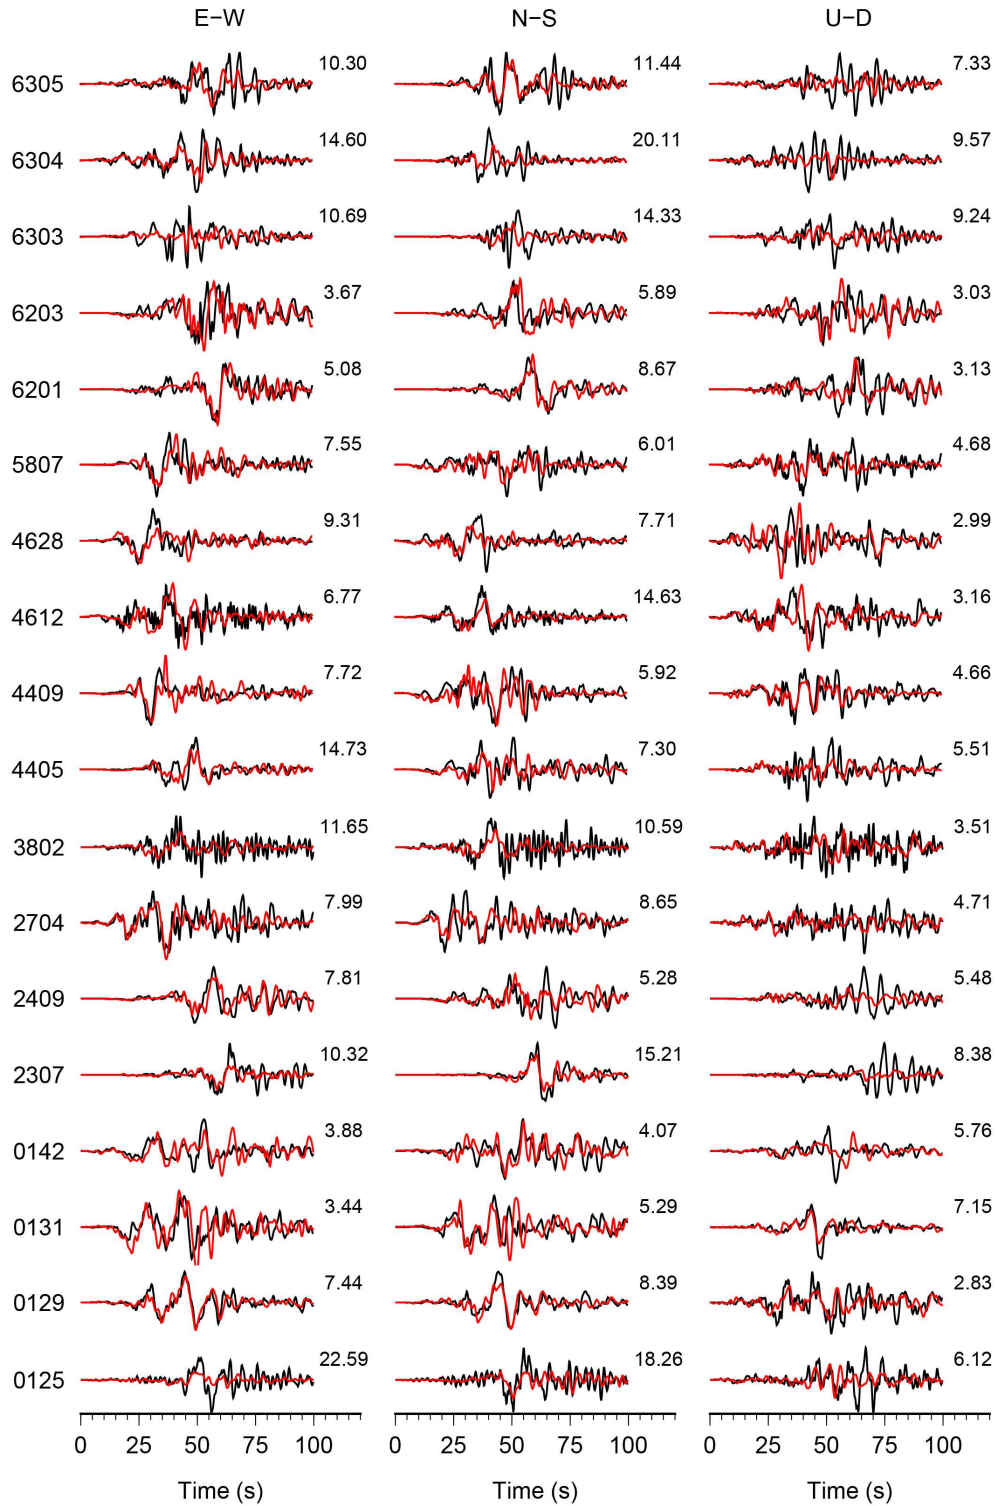

**Supplementary Fig. 7.** Comparisons of three-component strong-motion ground velocity observations (black) and synthetic seismograms (red) for the  $M_w$  7.8 slip model in Fig. 3. Data and synthetics are aligned on the first P arrivals. The station name is listed on the left of each row; the numbers at the upper right of each waveform comparison indicate the maximum observed ground velocity in cm/s.



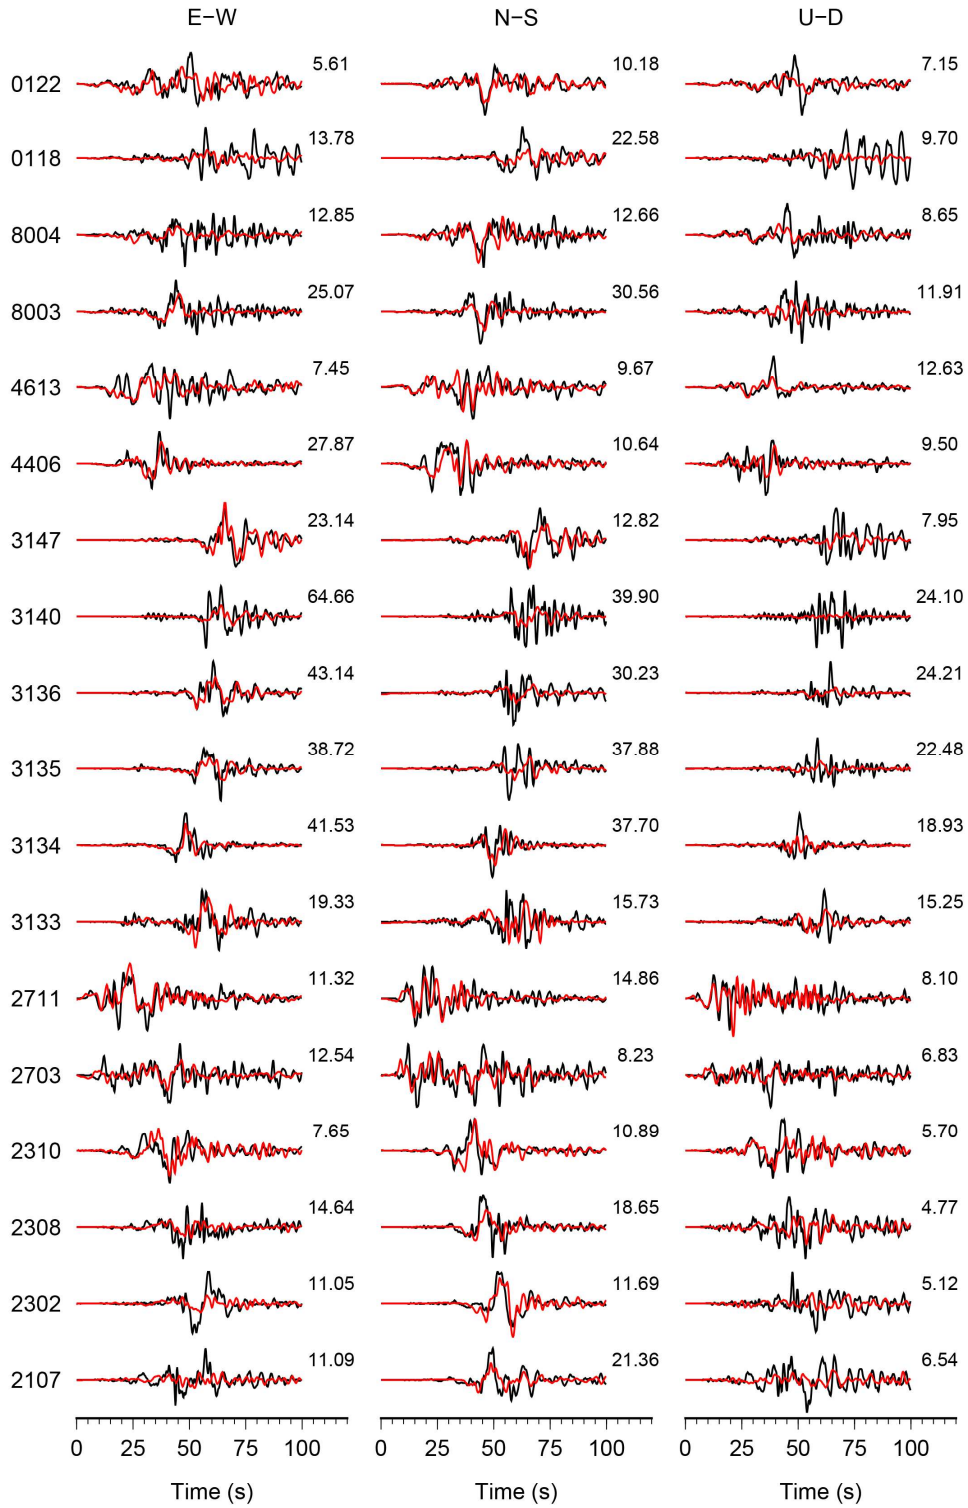

Supplementary Fig. 7. Continued.

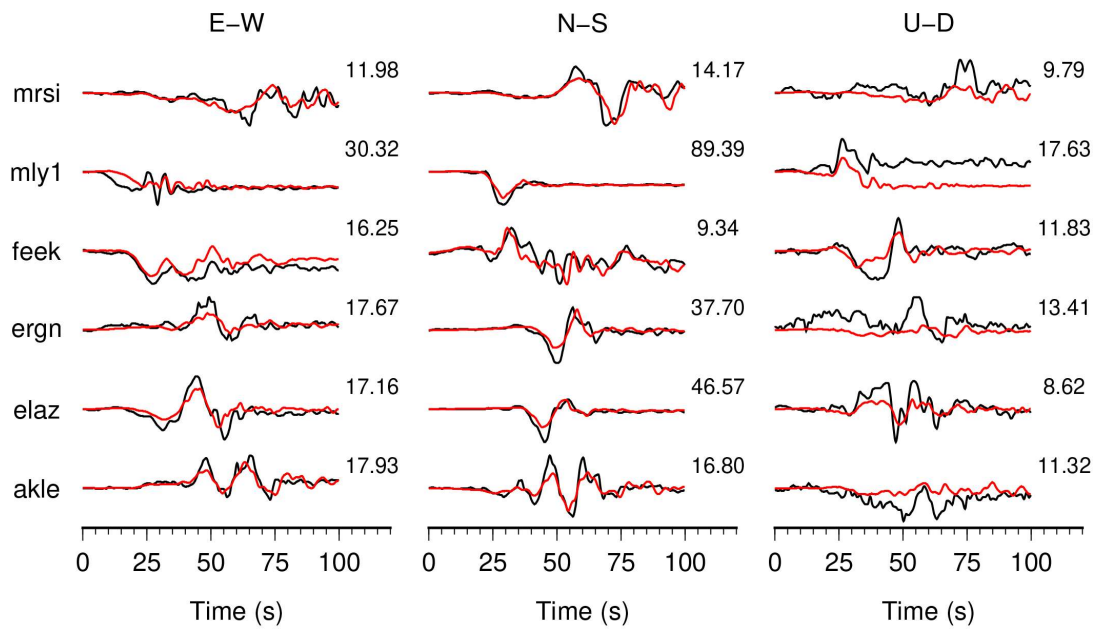

**Supplementary Fig. 8.** Comparisons of high-rate GNSS displacement time series (black) and synthetic seismograms (red) for the  $M_w$  7.8 slip model in Fig. 3. Data and synthetics are aligned on the first P arrivals. The station name is listed on the left of each row; the numbers at the upper right of each waveform comparison indicate the peak observed displacements in cm.

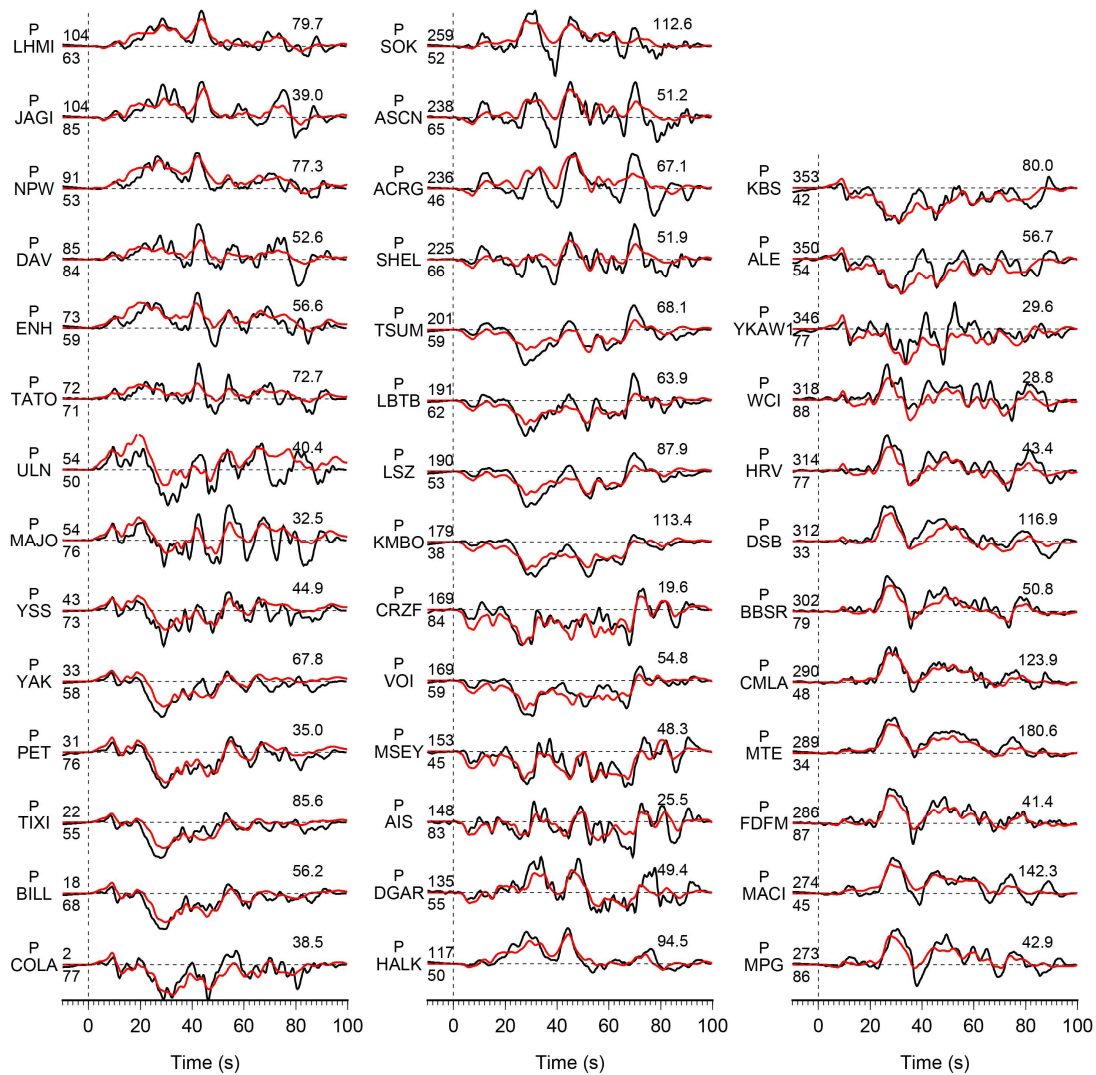

**Supplementary Fig. 9.** Comparison of observed (black) and synthetic (red) teleseismic P-wave ground displacements for the Mw 7.8 slip model in Fig. 3. Data and synthetic seismograms are manually aligned on the first arrivals. Station names and phase types are indicated on the left of each comparison. The azimuth (above) and epicentral distance (below) in degrees are shown at the beginning of each record. The number above the right portion of each comparison is the peak amplitude of the observed ground displacement in  $\mu\text{m}$ .

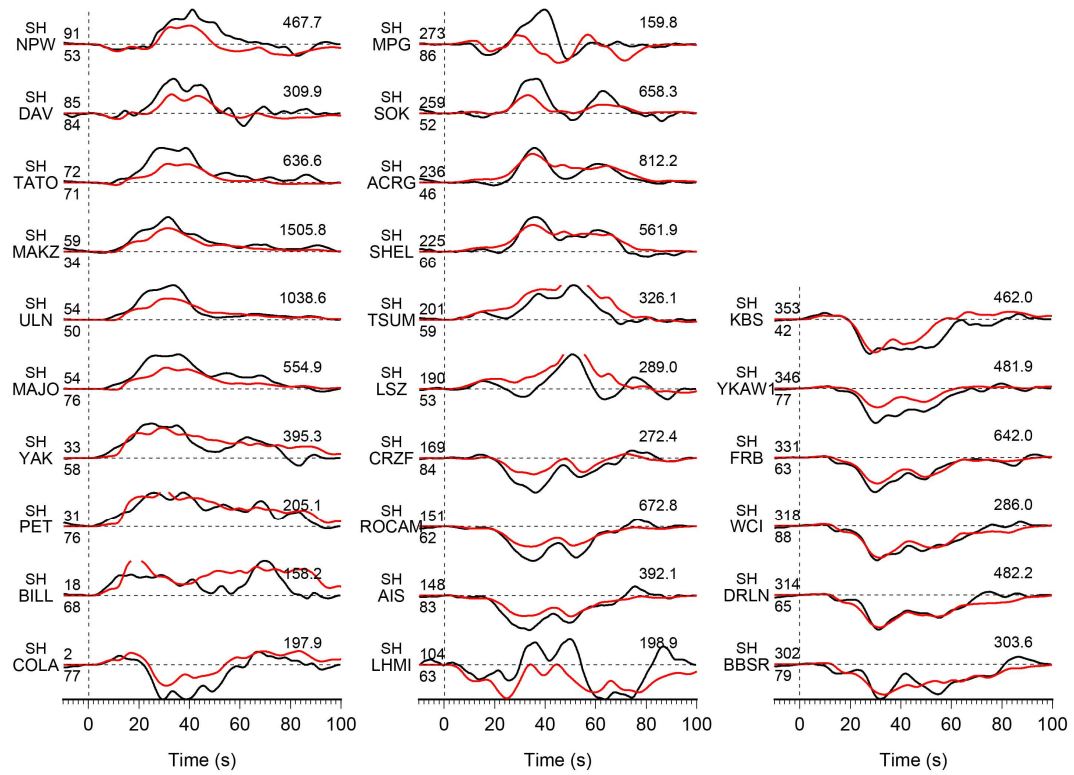

Supplementary Fig. 9. Continued, but for SH-waves.

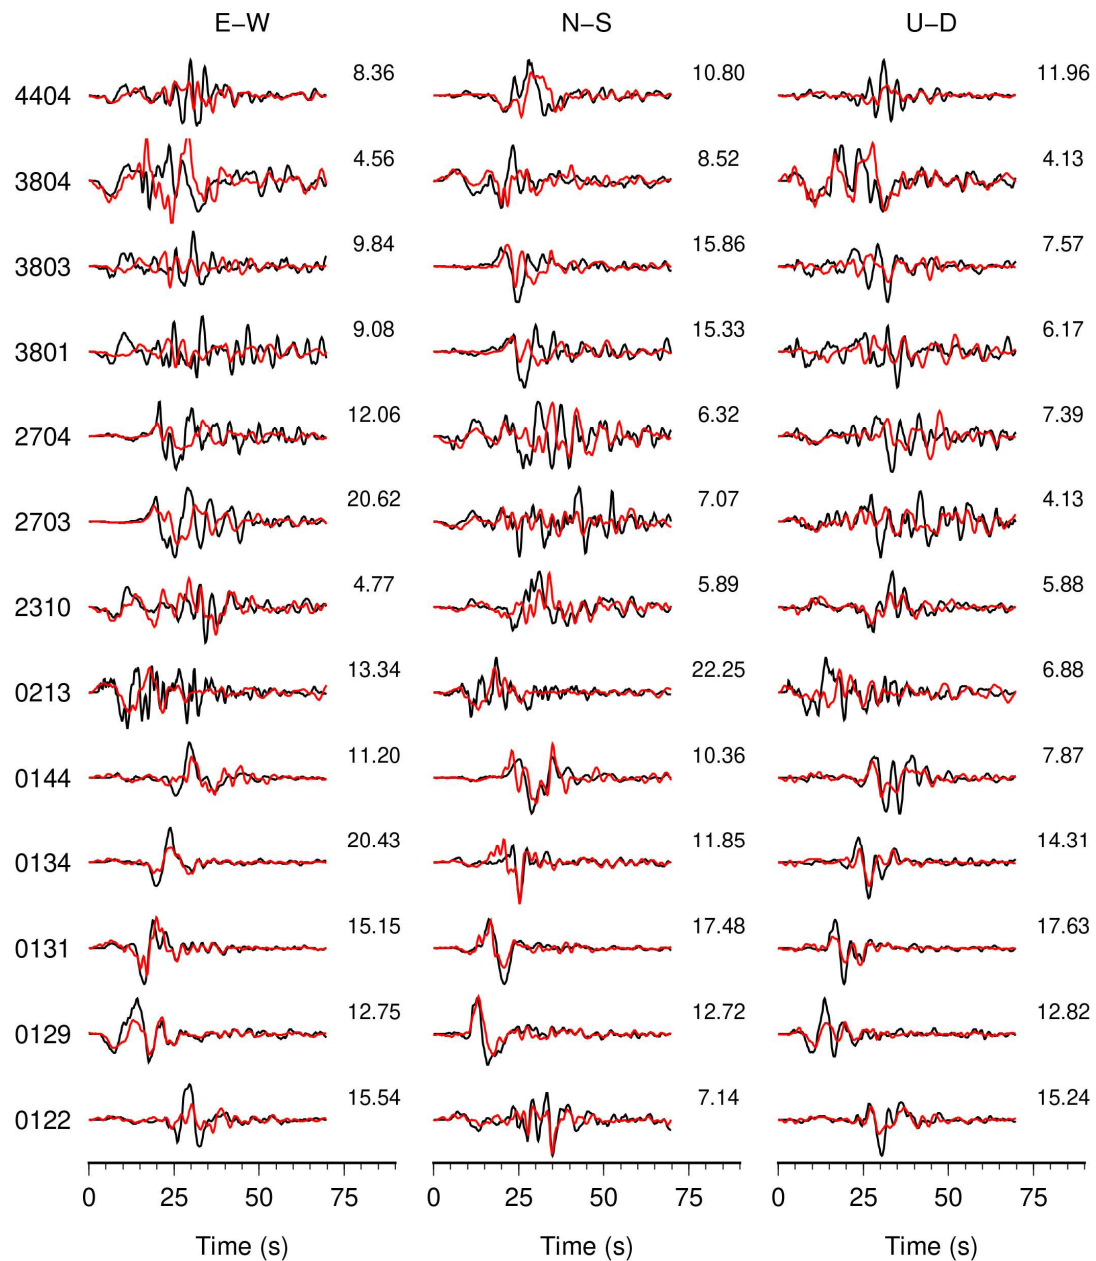

**Supplementary Fig. 10.** Comparisons of three-component strong-motion ground velocity observations (black) and synthetic seismograms (red) for the  $M_w$  7.7 slip model in Fig. 5. Data and synthetics are aligned on the first P arrivals. The station name is listed on the left of each row; the numbers at the upper right of each waveform comparison indicate the maximum observed ground velocity in cm/s.

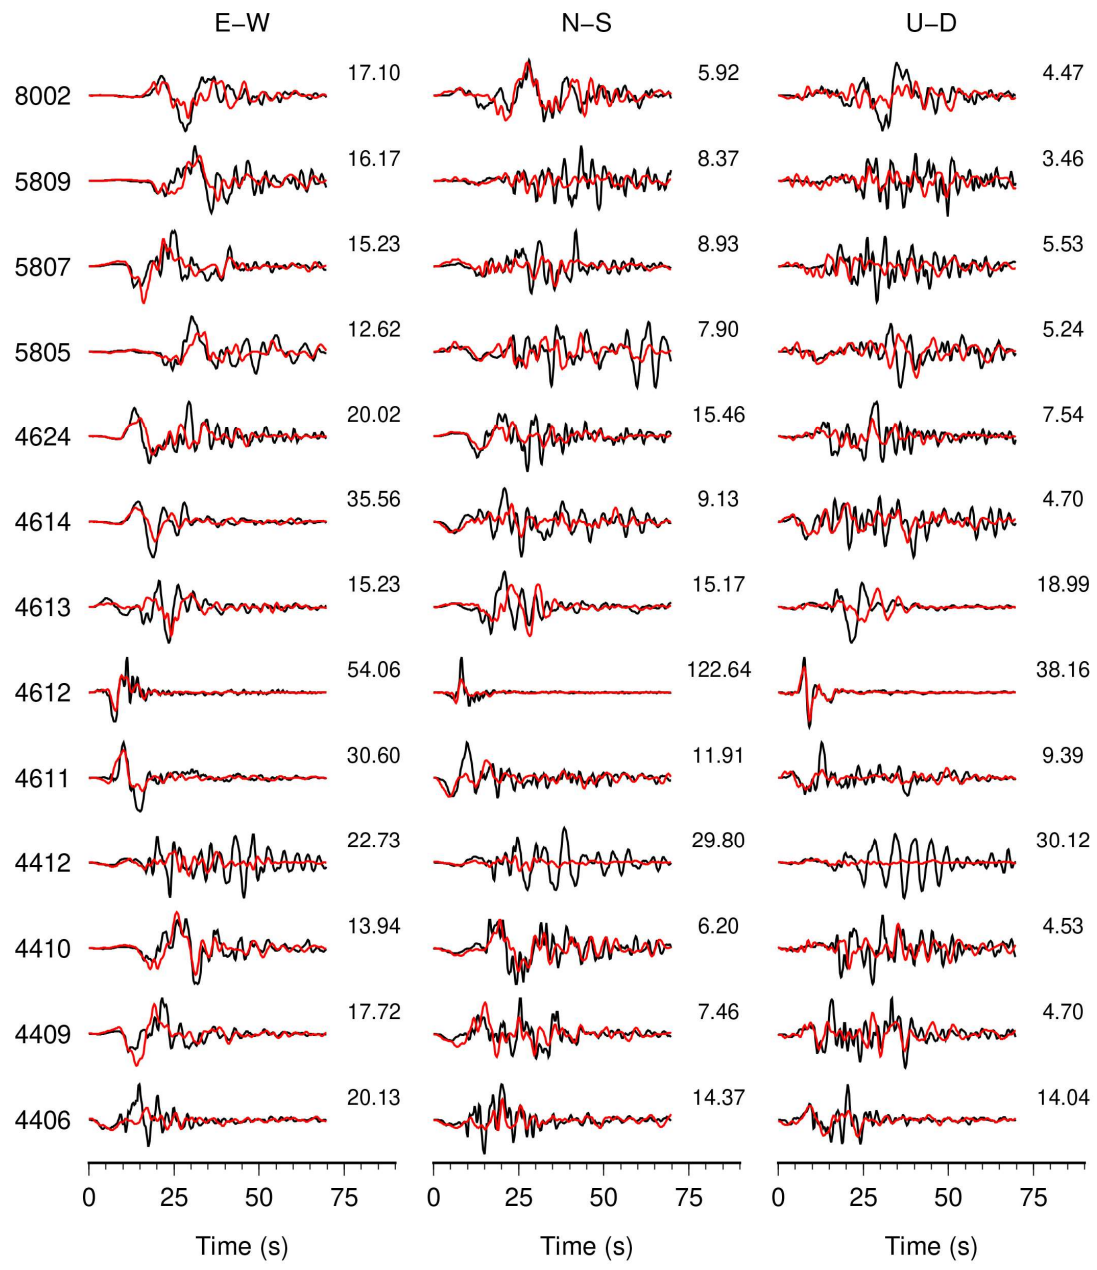

**Supplementary Fig. 10.** Continued.

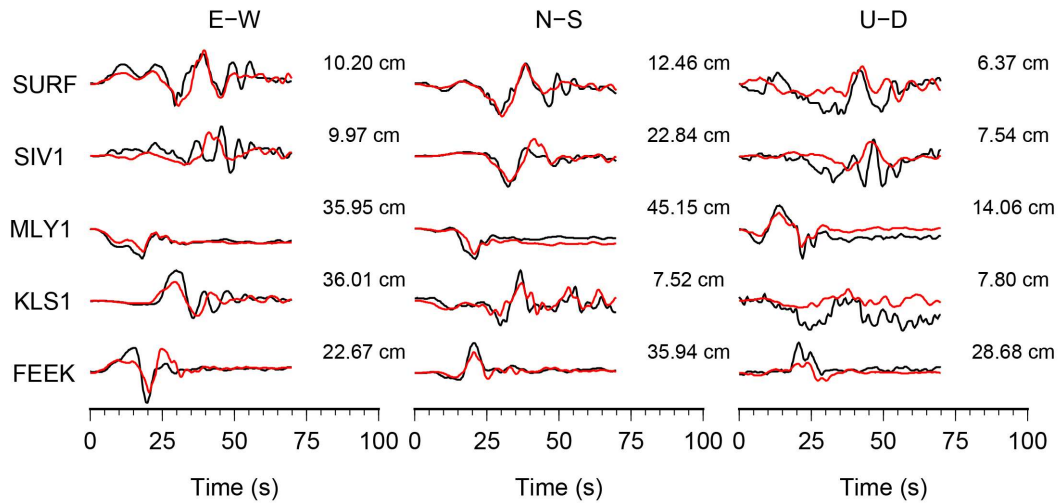

**Supplementary Fig. 11.** Comparisons of high-rate GNSS displacement time series (black) and synthetic seismograms (red) for the  $M_w$  7.7 slip model in Fig. 5. Data and synthetics are aligned on the first P arrivals. The station name is listed on the left of each row; the numbers at the upper right of each waveform comparison indicate the peak observed displacements in cm.

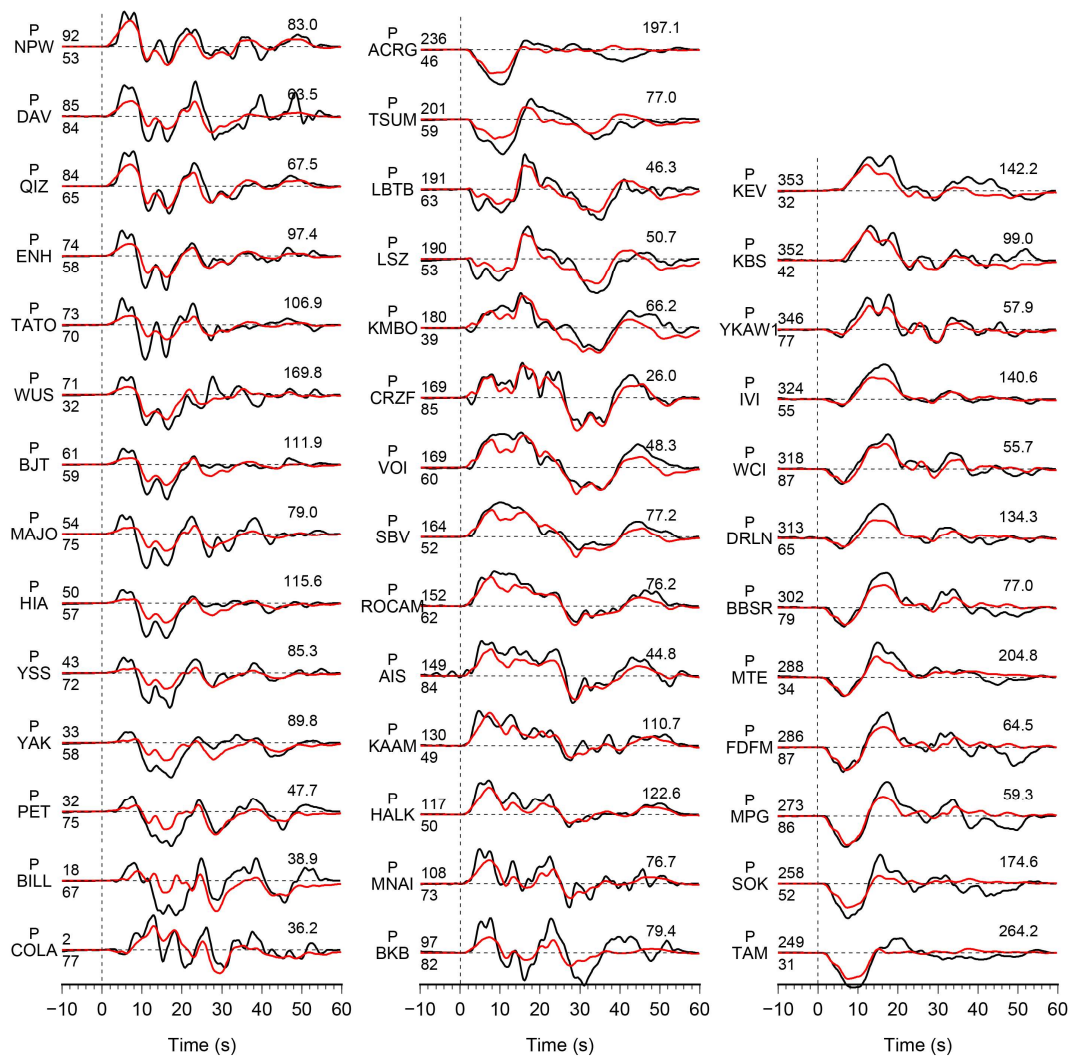

**Supplementary Fig. 12.** Comparison of observed (black) and synthetic (red) teleseismic P-wave ground displacements for the Mw 7.7 slip model in Fig. 5. Data and synthetic seismograms are manually aligned on the first arrivals. Station names and phase types are indicated on the left of each comparison. The azimuth (above) and epicentral distance (below) in degrees are shown at the beginning of each record. The number above the right portion of each comparison is the peak amplitude of the observed ground displacement in  $\mu\text{m}$ .



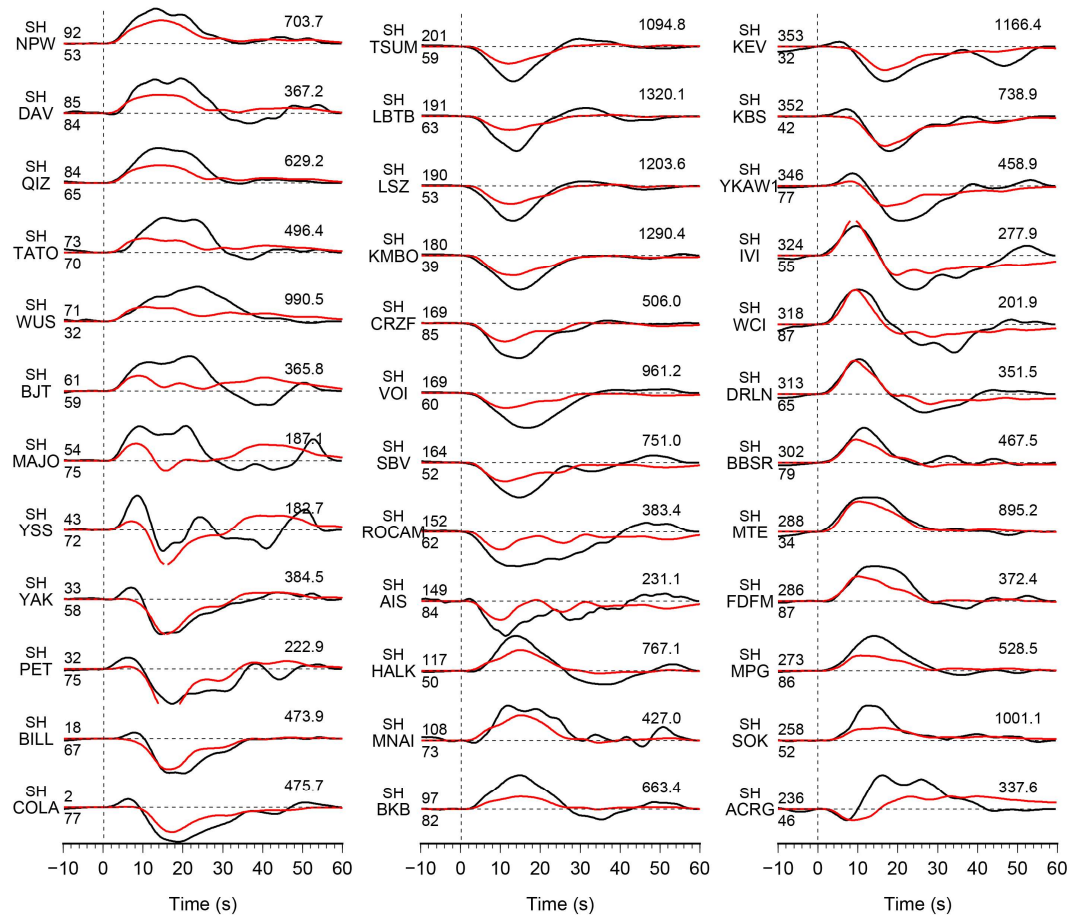

Supplementary Fig. 12. Continued, but for SH-waves.

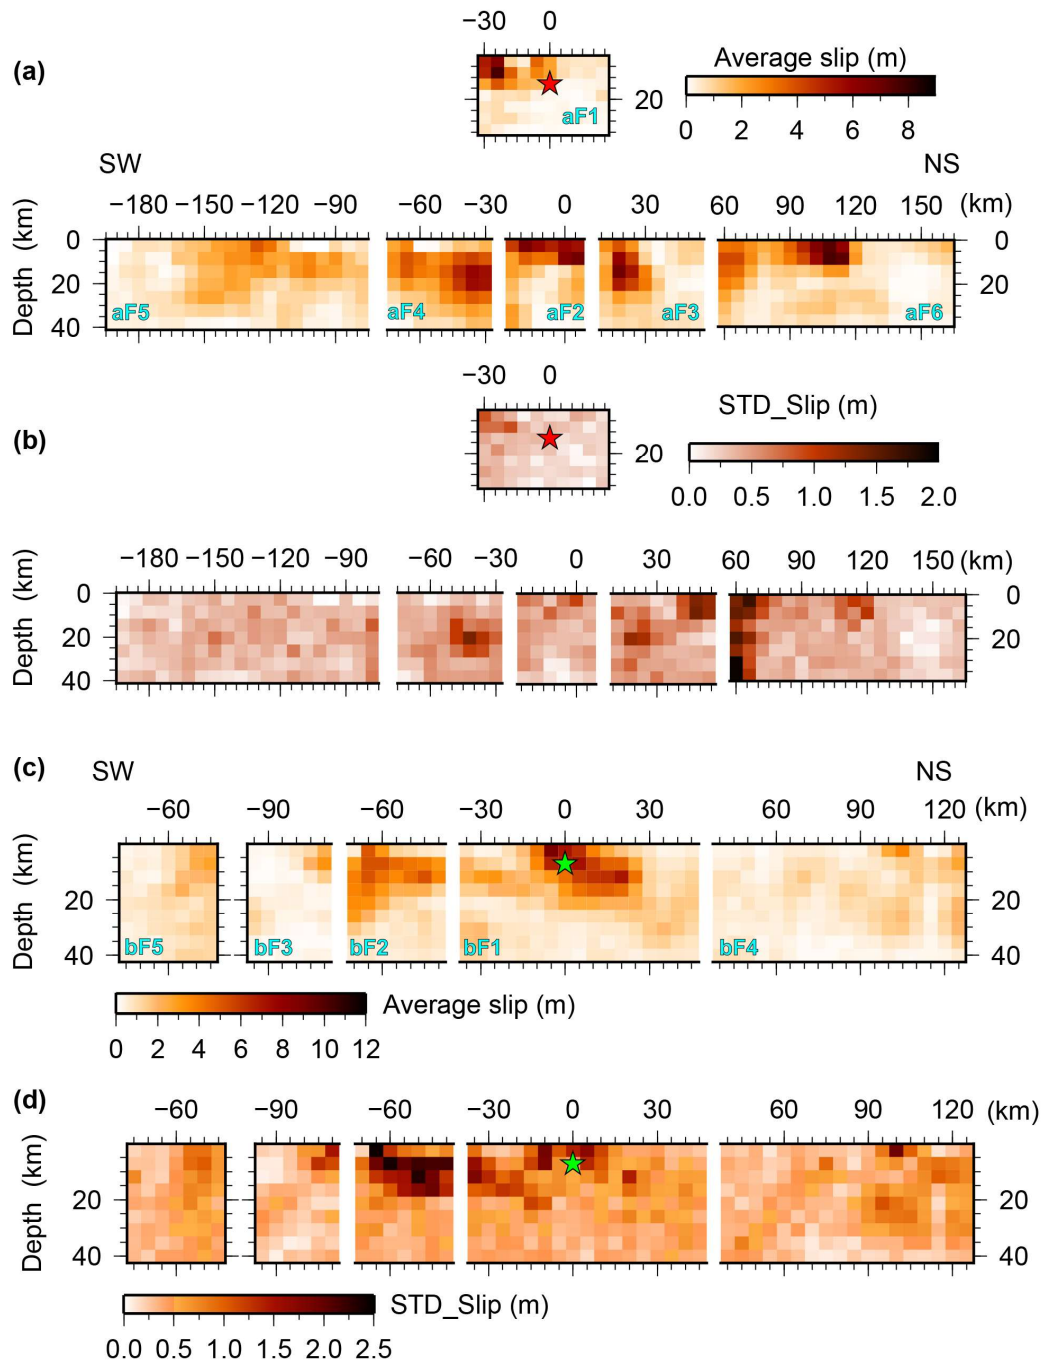

**Supplementary Fig. 13.** The average slip distribution (a) and (c), and standard deviation estimates (STD) (b) and (d) of ten models with different random seeds for the  $M_w$  7.8 event and the  $M_w$  7.7 event, respectively. The red and green stars show epicenters of the  $M_w$  7.8 and  $M_w$  7.7 events, respectively.

**Supplementary Table 1.** The coseismic displacements derived from the strong motion data.

| The M <sub>w</sub> 7.8 event |          |           |         |         |         |
|------------------------------|----------|-----------|---------|---------|---------|
| SM Station                   | Latitude | Longitude | E-W (m) | N-S (m) | U-D (m) |
| 4615                         | 37.3868  | 37.1380   | 0.834   | -0.665  | -0.689  |
| 4616                         | 37.3755  | 36.8384   | -0.729  | -0.710  | -0.122  |
| 4624                         | 37.5361  | 36.9176   | -1.108  | -0.246  |         |
| 2712                         | 37.184   | 36.7328   | 0.345   | 0.356   |         |
| 4614                         | 37.4851  | 37.2977   | 2.780   | -0.014  |         |
| 4617                         | 37.5855  | 36.8303   | -0.498  | -0.465  |         |
| 2718                         | 37.0078  | 36.6266   | 0.293   | 0.776   |         |
| 4611                         | 37.7472  | 37.2843   | -0.060  | -0.242  |         |
| 4613                         | 37.5701  | 36.3574   | -0.195  | 0.069   |         |
| 3143                         | 36.8489  | 36.5571   | 0.131   | 0.273   |         |
| 8003                         | 37.0842  | 36.2694   | -0.205  | -0.251  |         |
| 3137                         | 36.6929  | 36.4885   | 0.964   | 1.242   |         |
| 3134                         | 36.8276  | 36.2048   | -0.168  | -0.372  |         |
| 3142                         | 36.4980  | 36.3661   | 0.105   | 1.357   |         |
| 3115                         | 36.5463  | 36.1646   | -0.165  | -0.222  |         |
| 4408                         | 38.0962  | 37.8873   | -0.627  | -0.262  |         |
| 3133                         | 36.2432  | 36.5736   | -0.083  | 0.145   |         |
| 4406                         | 38.3439  | 37.9738   | -0.098  | -0.192  |         |
| 3136                         | 36.1159  | 36.2472   | -0.094  | 0.221   |         |
| 3140                         | 36.0816  | 35.9498   | -0.044  | 0.071   |         |
| The M <sub>w</sub> 7.7 event |          |           |         |         |         |
| SM Station                   | Latitude | Longitude | E-W (m) | N-S (m) | U-D (m) |
| 4611                         | 37.7472  | 37.2843   | 0.229   | -0.112  |         |
| 4612                         | 38.0239  | 36.4819   | -0.198  | 0.154   |         |
| 4406                         | 38.3439  | 37.9738   | -0.367  | -0.268  |         |
| 4412                         | 38.5969  | 38.1838   | -0.205  | -0.173  |         |

**Supplementary Table 2.** Fault geometry parameters of the 2023 Türkiye earthquake doublet used in the joint inversion.

| Fault-segment parameters of the $M_w$ 7.8 event |      |      |      |      |      |      |
|-------------------------------------------------|------|------|------|------|------|------|
|                                                 | F1   | F2   | F3   | F4   | F5   | F6   |
| Strike                                          | 202° | 248° | 231° | 31°  | 23°  | 247° |
| Dip                                             | 60°  | 80°  | 80°  | 80°  | 80°  | 70°  |
| Fault-segment parameters of the $M_w$ 7.7 event |      |      |      |      |      |      |
|                                                 | F1   | F2   | F3   | F4   | F5   |      |
| Strike                                          | 282° | 258° | 208° | 237° | 177° |      |
| Dip                                             | 70°  | 70°  | 70°  | 70°  | 70°  |      |

**Supplementary Table 3.** Ranges of the source parameters allowed for each subfault during the joint inversion.

|                 | The $M_w$ 7.8 event | The $M_w$ 7.7 event |
|-----------------|---------------------|---------------------|
| Slip (m)        | (0.0, 20.0)         | (0.0, 20.0)         |
| Rake (°)        | (-45, 45)           | (-90, 90)           |
| Rise time (s)   | (2.4, 24)           | (1.6, 16)           |
| Velocity (km/s) | (1.5, 4.5)          | (2.0, 5.0)          |
